# Supplementary figures and images for: Blood Supply to the Integument of the Abdomen of the Rat: A Surgical Perspective
Source: PubMed Central journal article supplement — Plast Reconstr Surg Glob Open. 2017 Sep 11;5(9):e1454. doi: 10.1097/GOX.0000000000001454 (PMC5640333; doi:10.1097/gox.0000000000001454), 2017-09-11

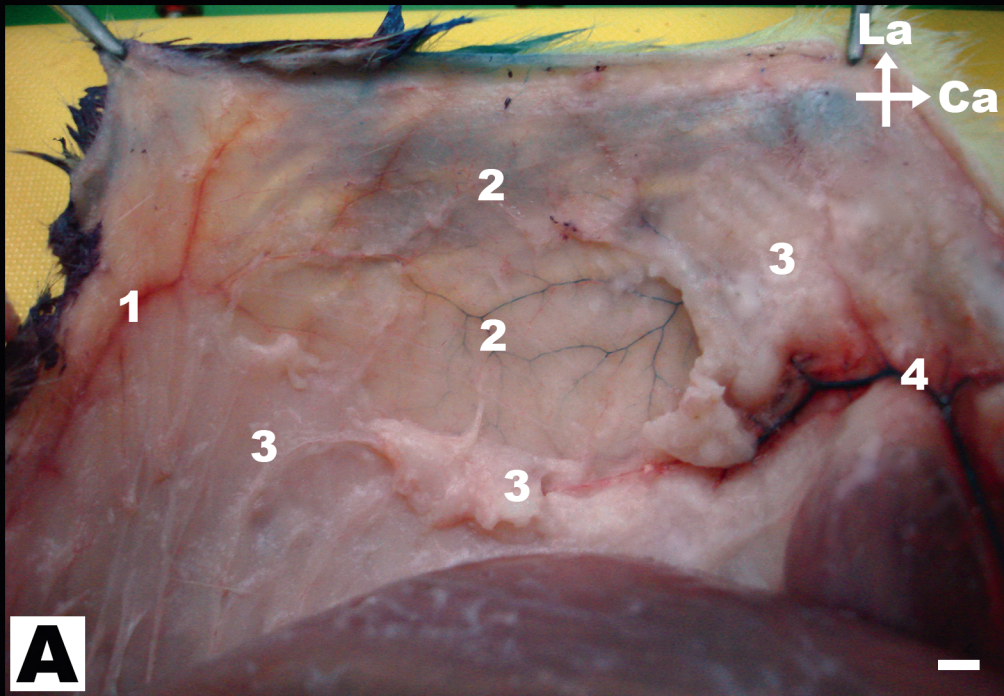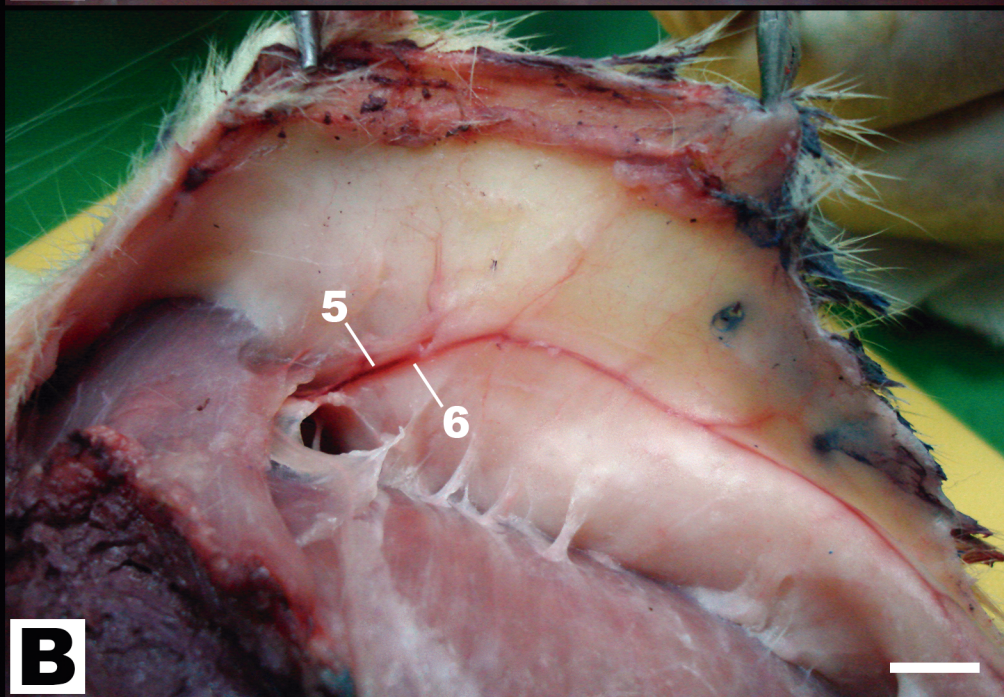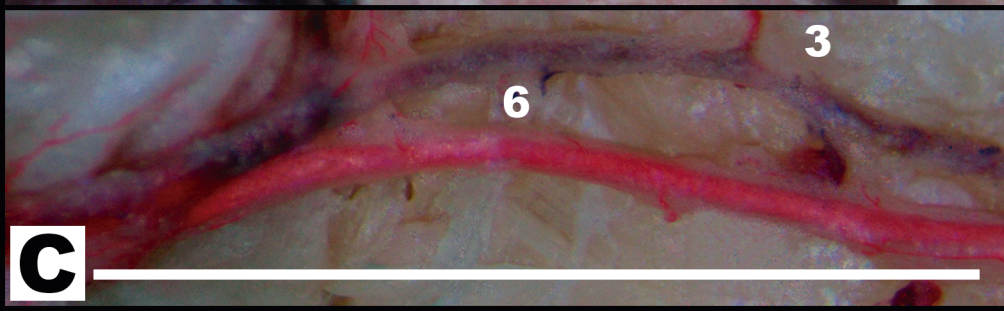

Supplement: gox-5-e1454-s001.pdf [file gox-5-e1454-s001.pdf]

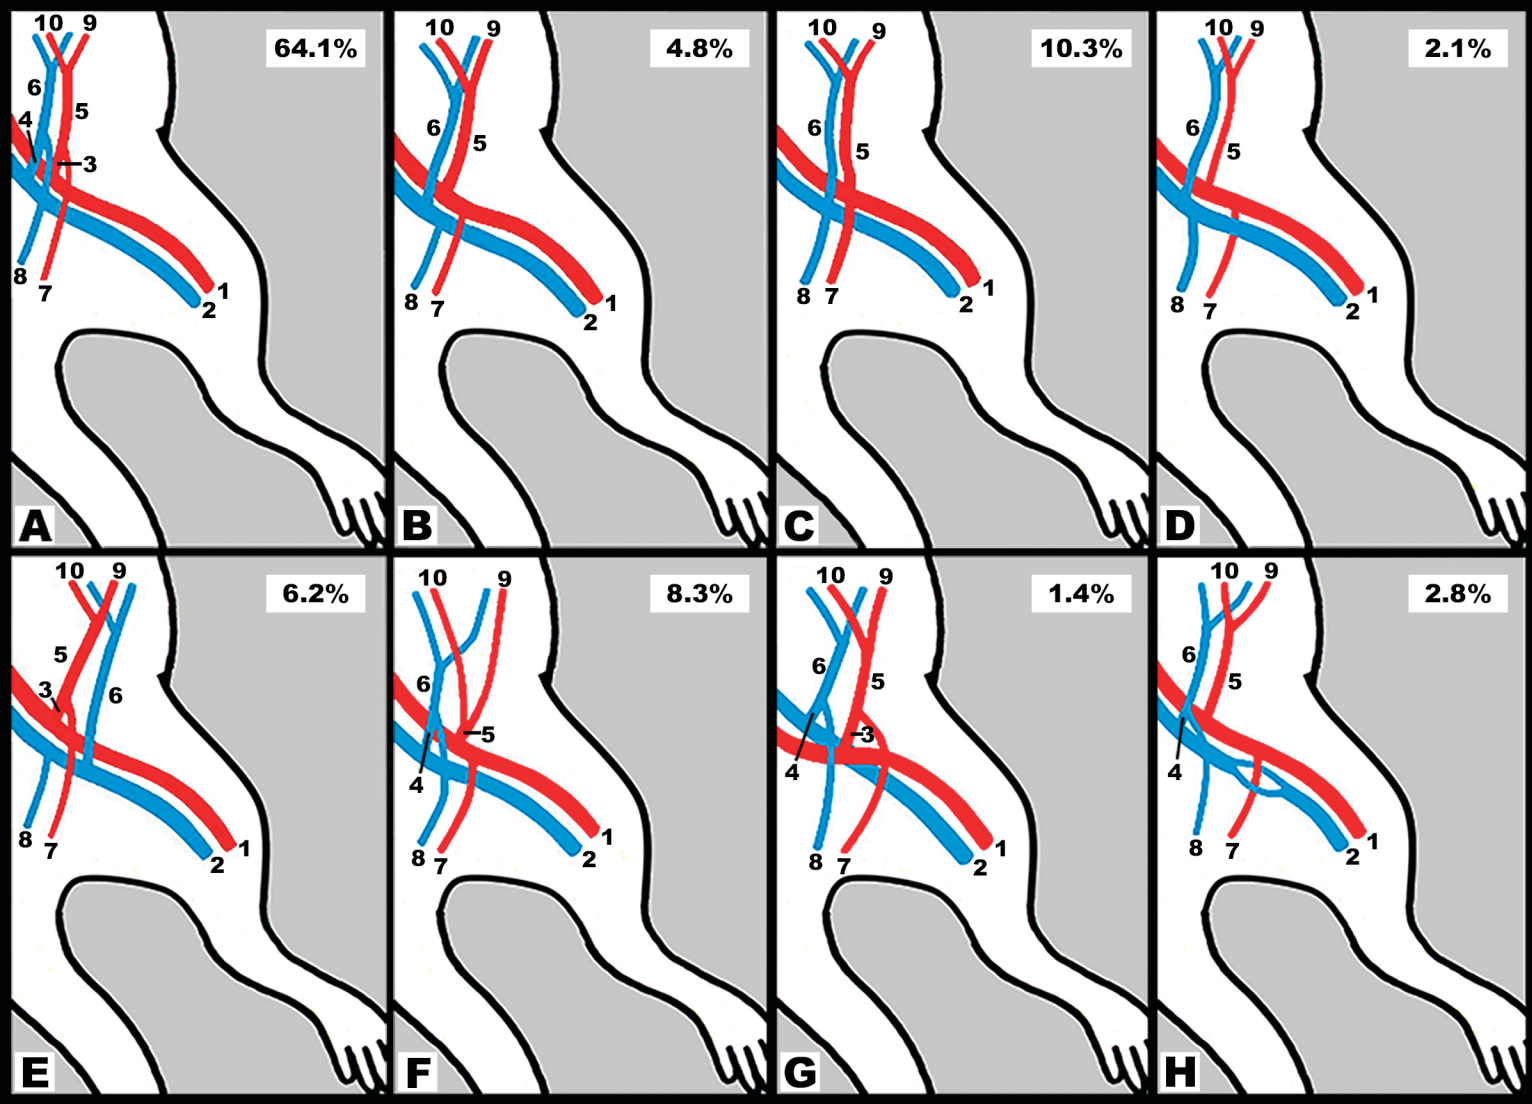

Supplement: gox-5-e1454-s002.pdf [file gox-5-e1454-s002.pdf]

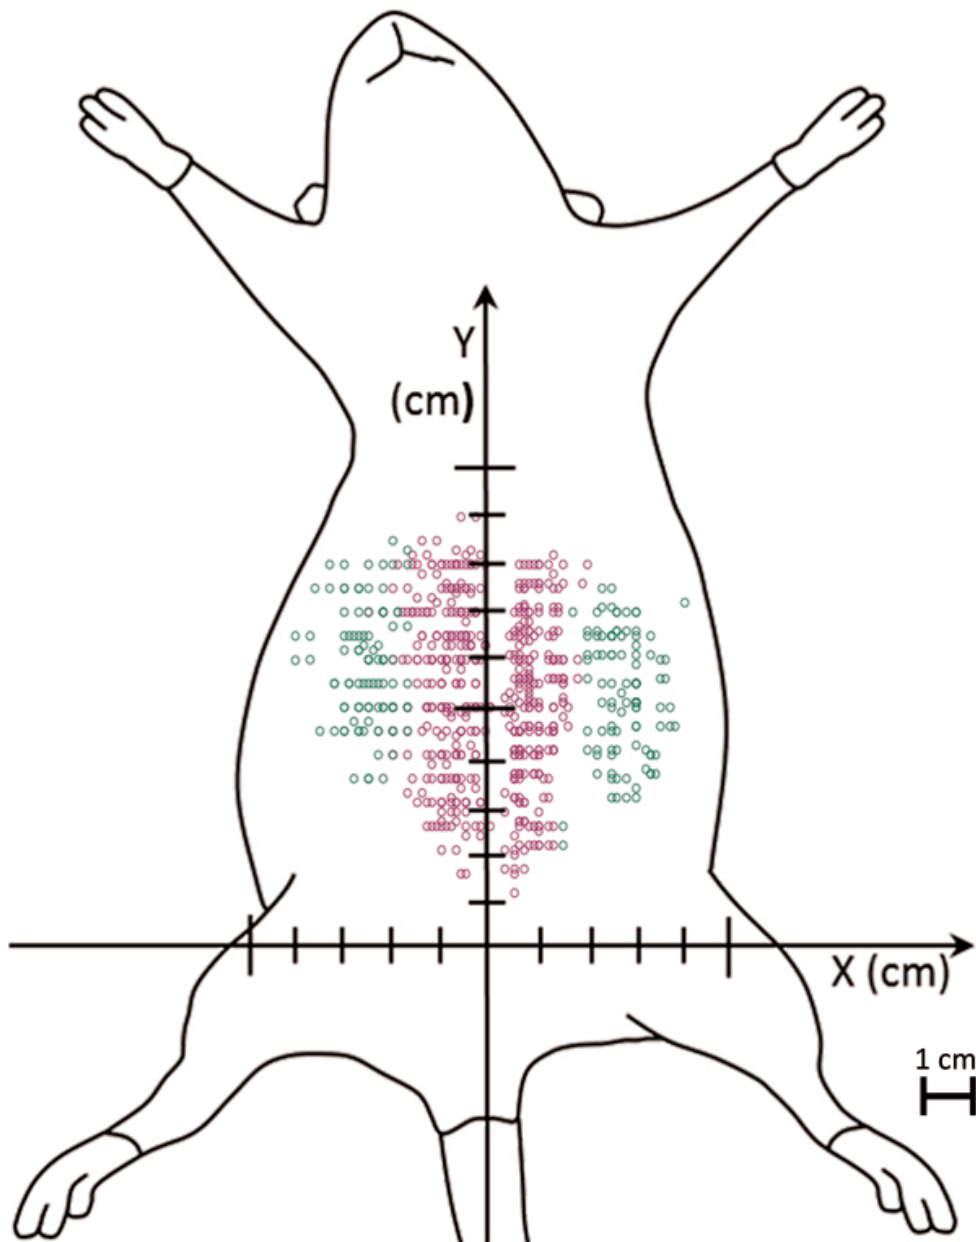

Perforator Origin    ○ Epigastric arteries    ○ Segmental supplying arteries

Supplement: gox-5-e1454-s003.pdf [file gox-5-e1454-s003.pdf]

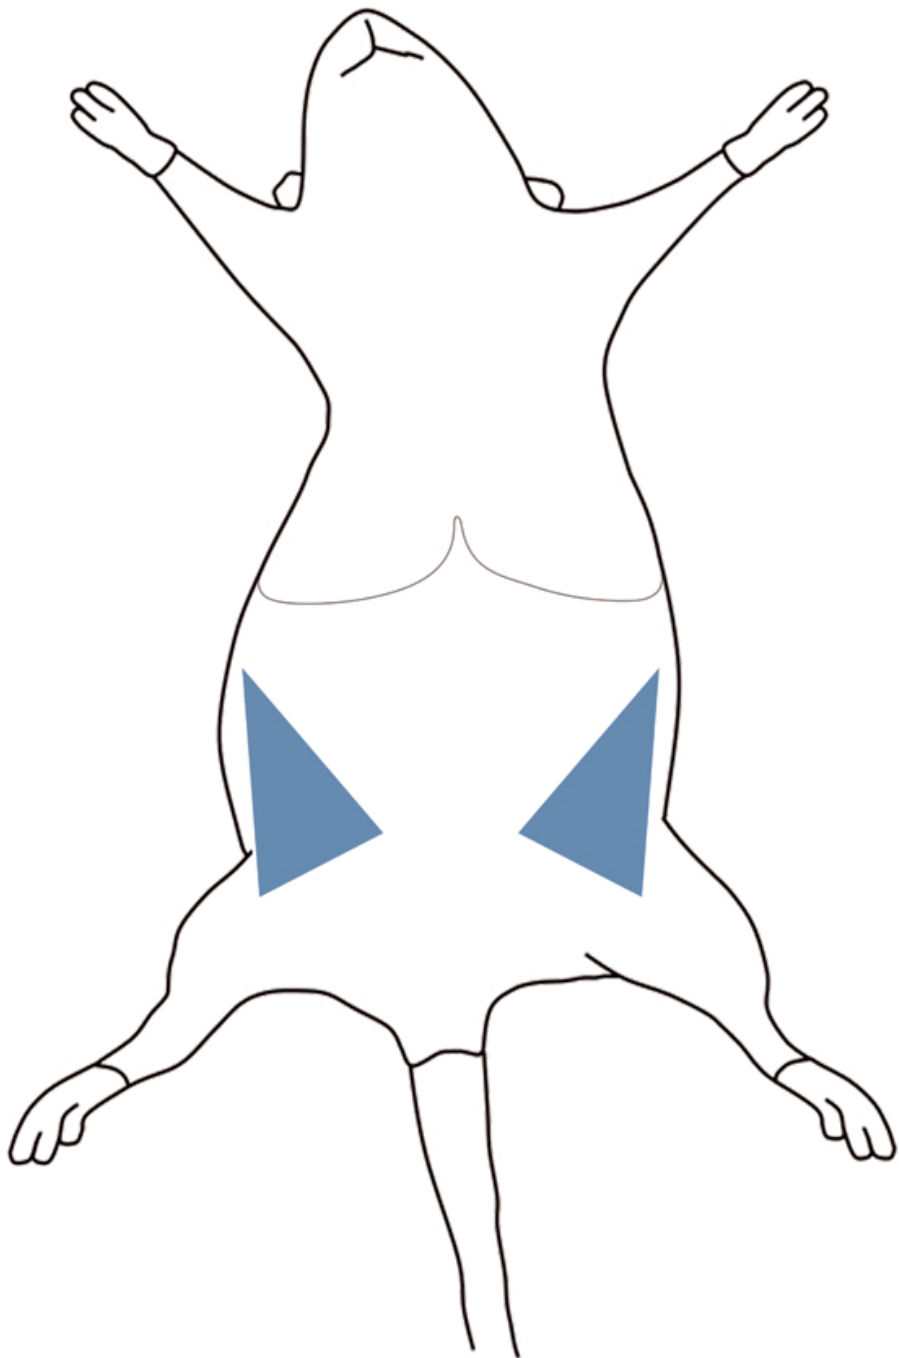

Supplement: gox-5-e1454-s004.pdf [file gox-5-e1454-s004.pdf]

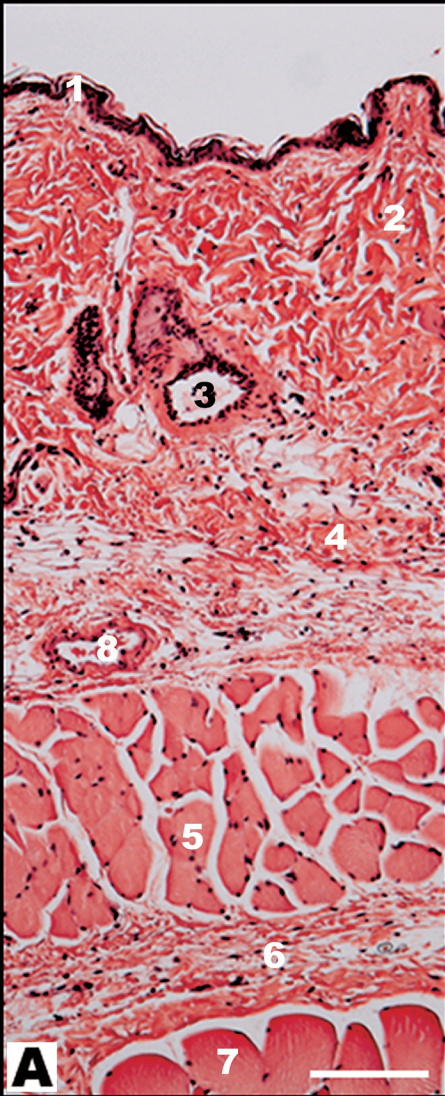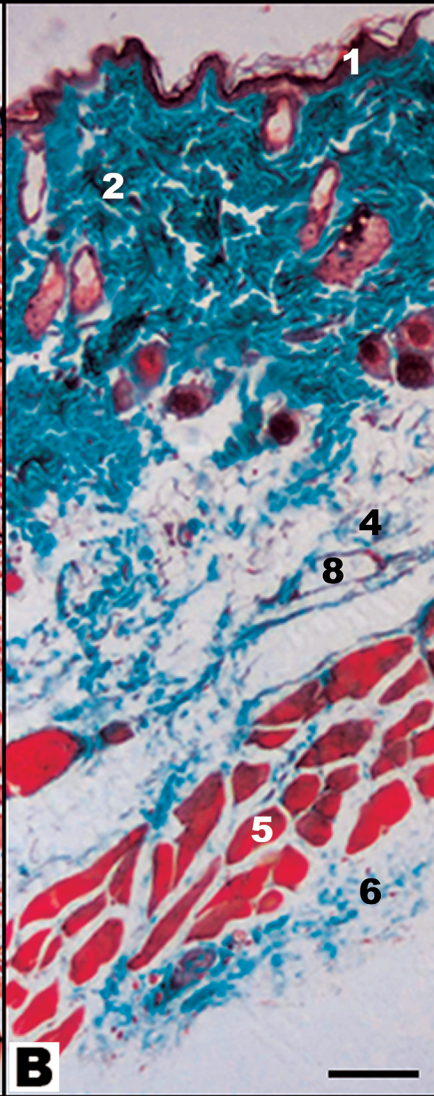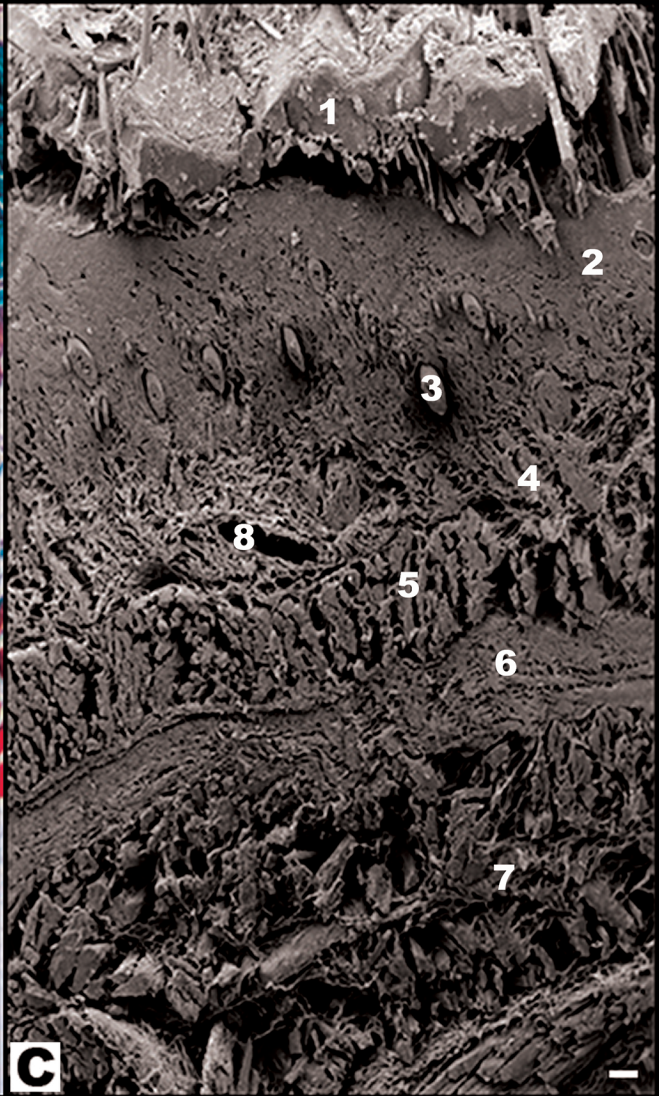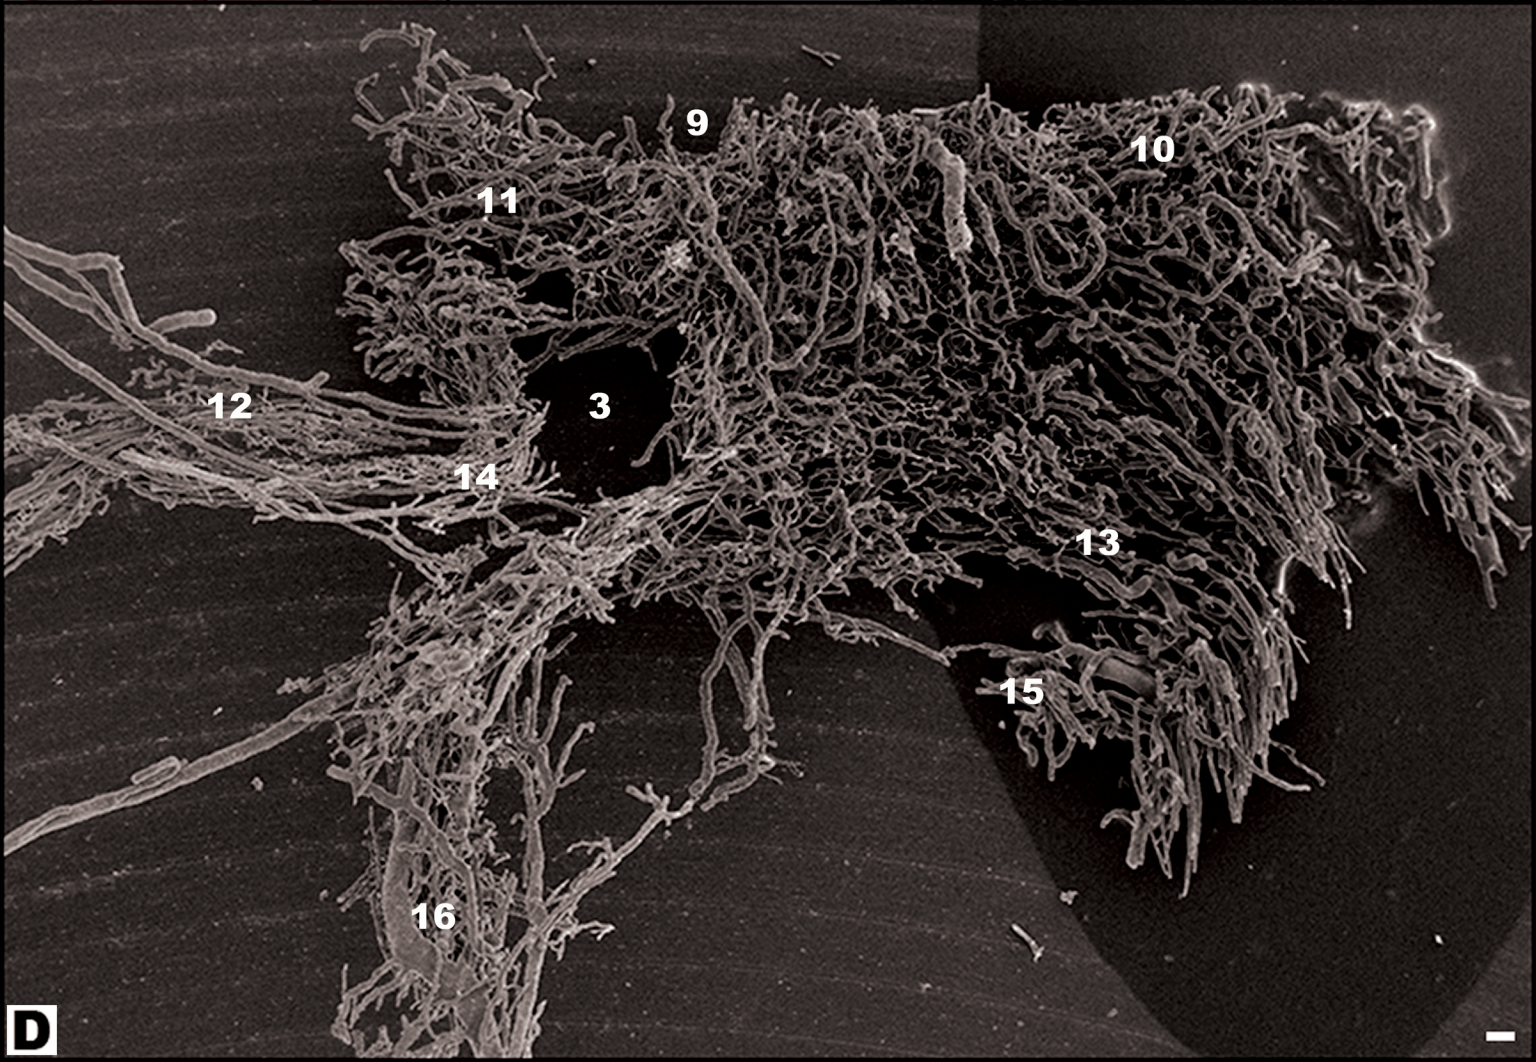

Supplement: gox-5-e1454-s005.pdf [file gox-5-e1454-s005.pdf]

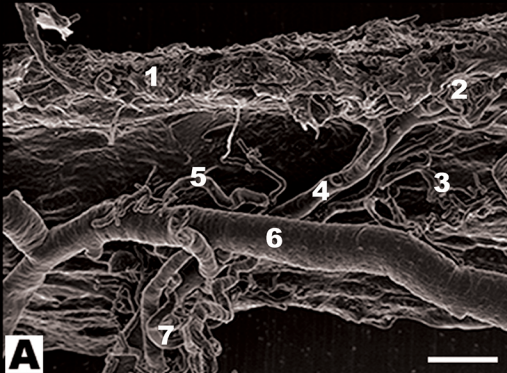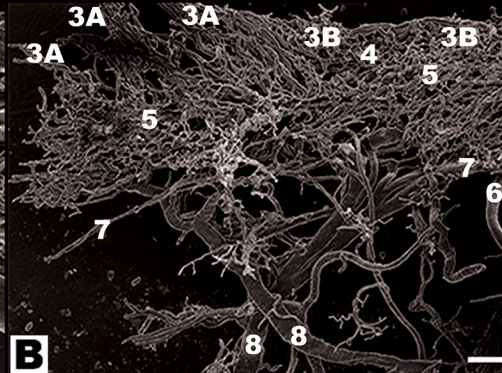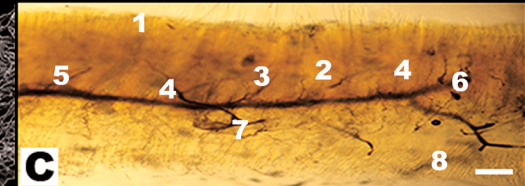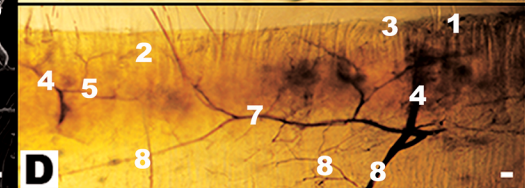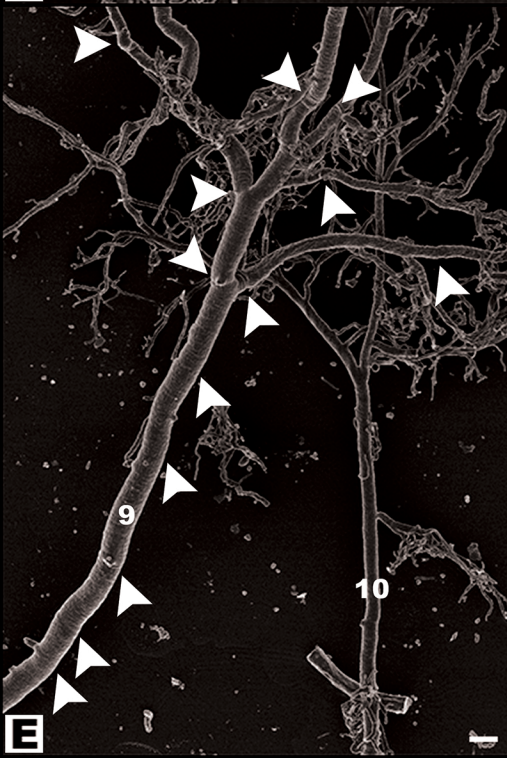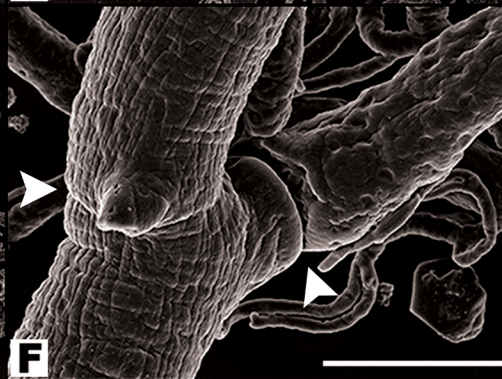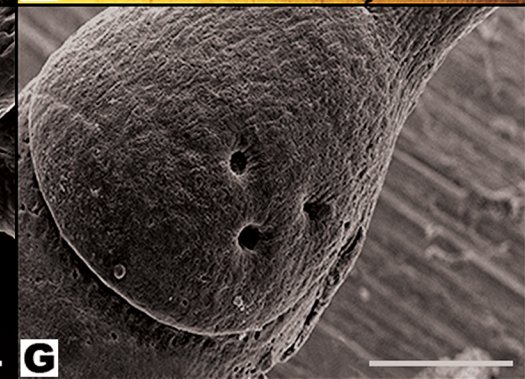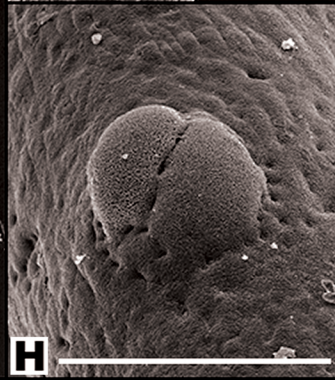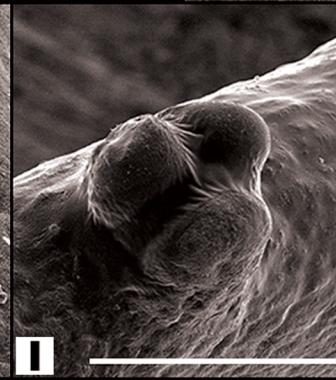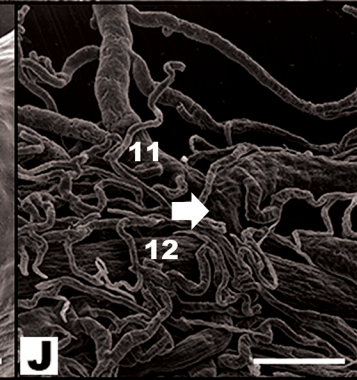

Supplement: gox-5-e1454-s006.pdf [file gox-5-e1454-s006.pdf]

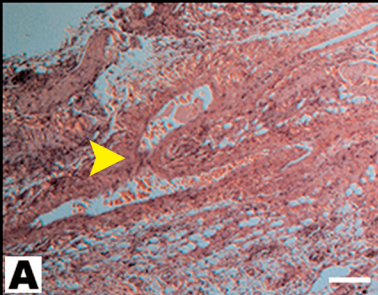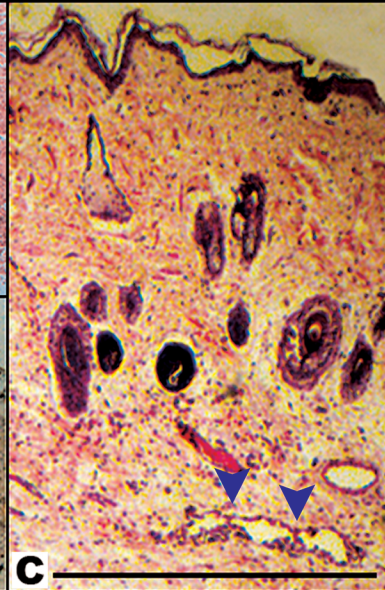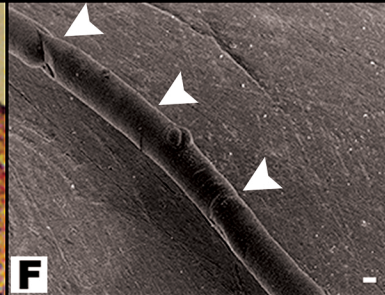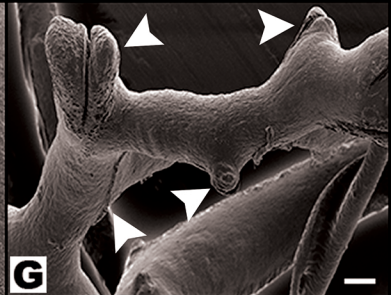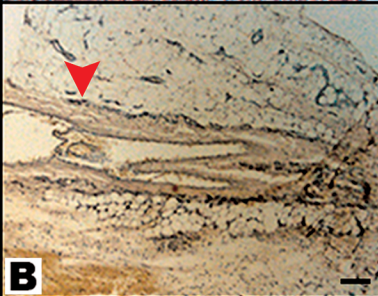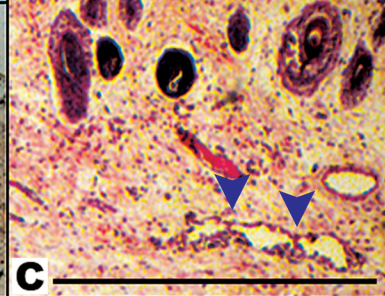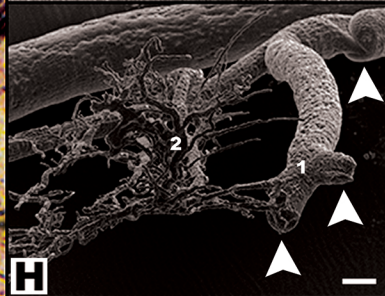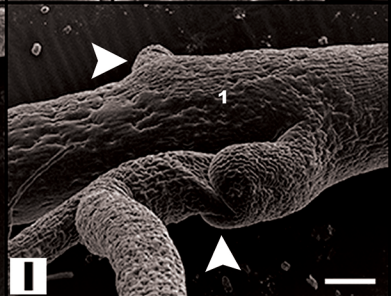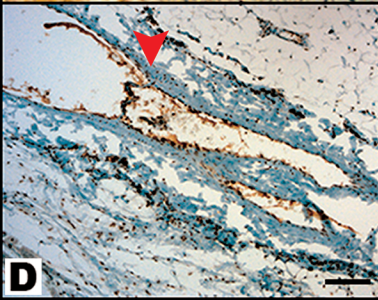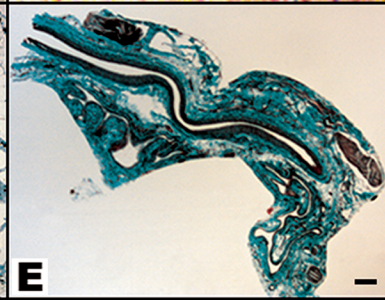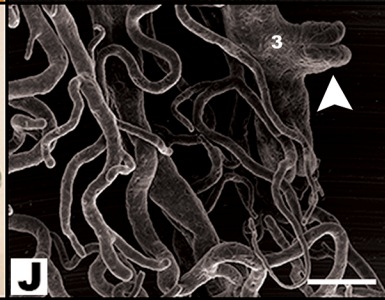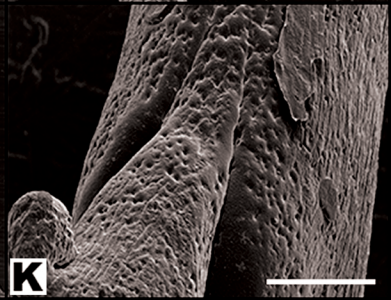

Supplement: gox-5-e1454-s007.pdf [file gox-5-e1454-s007.pdf]

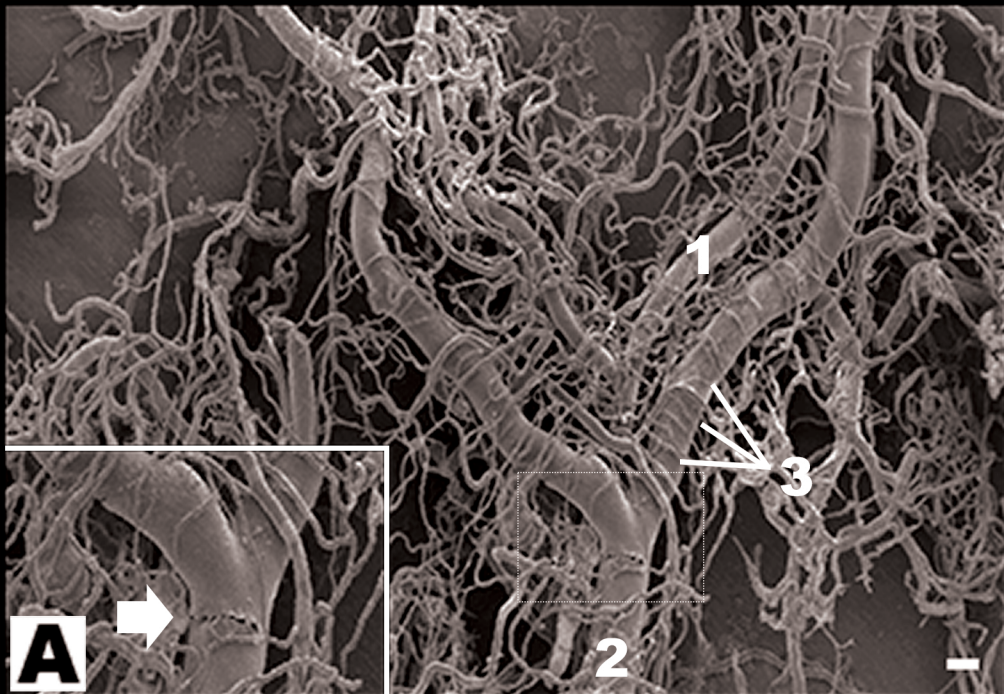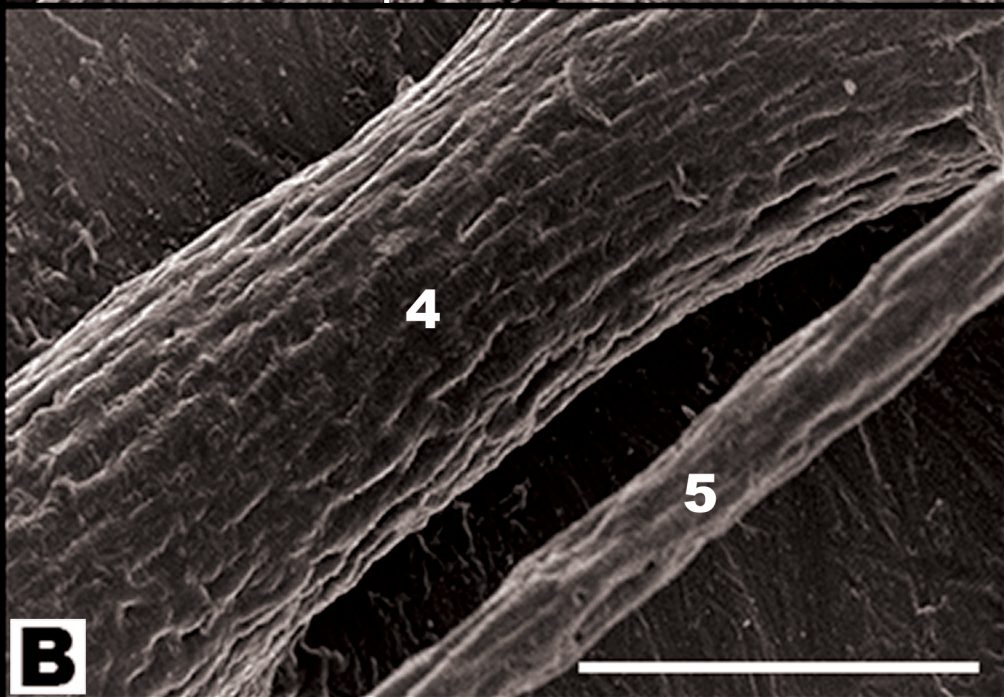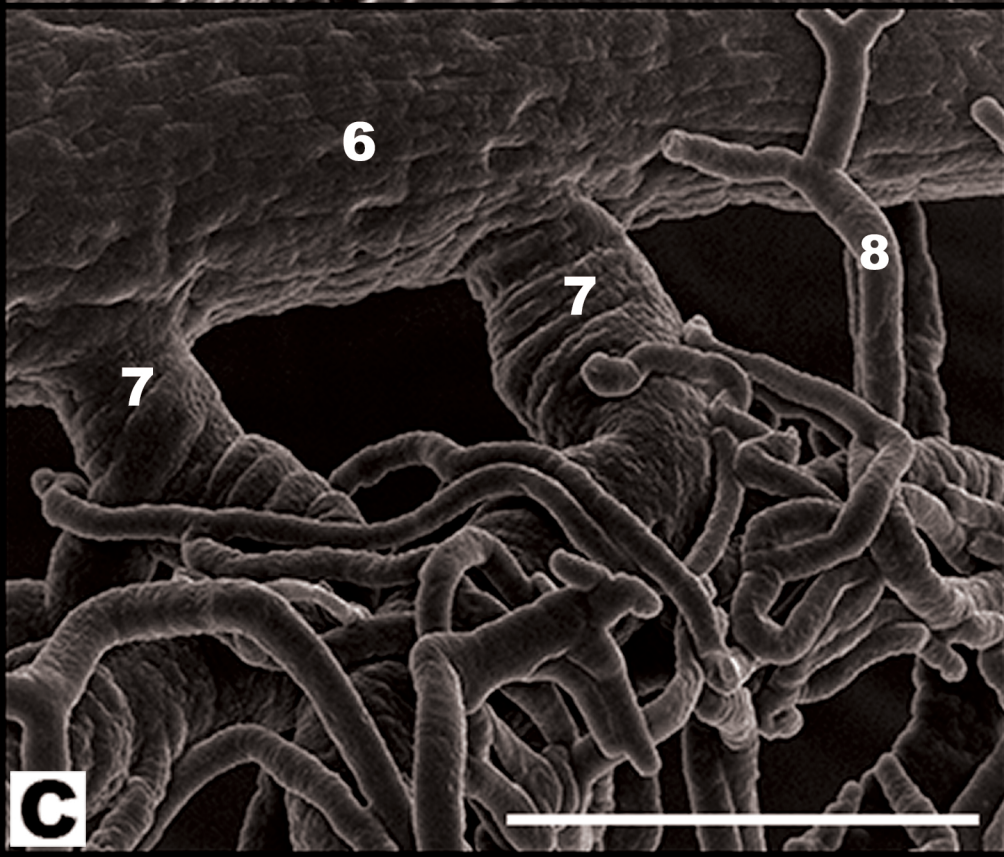

Supplement: gox-5-e1454-s008.pdf [file gox-5-e1454-s008.pdf]

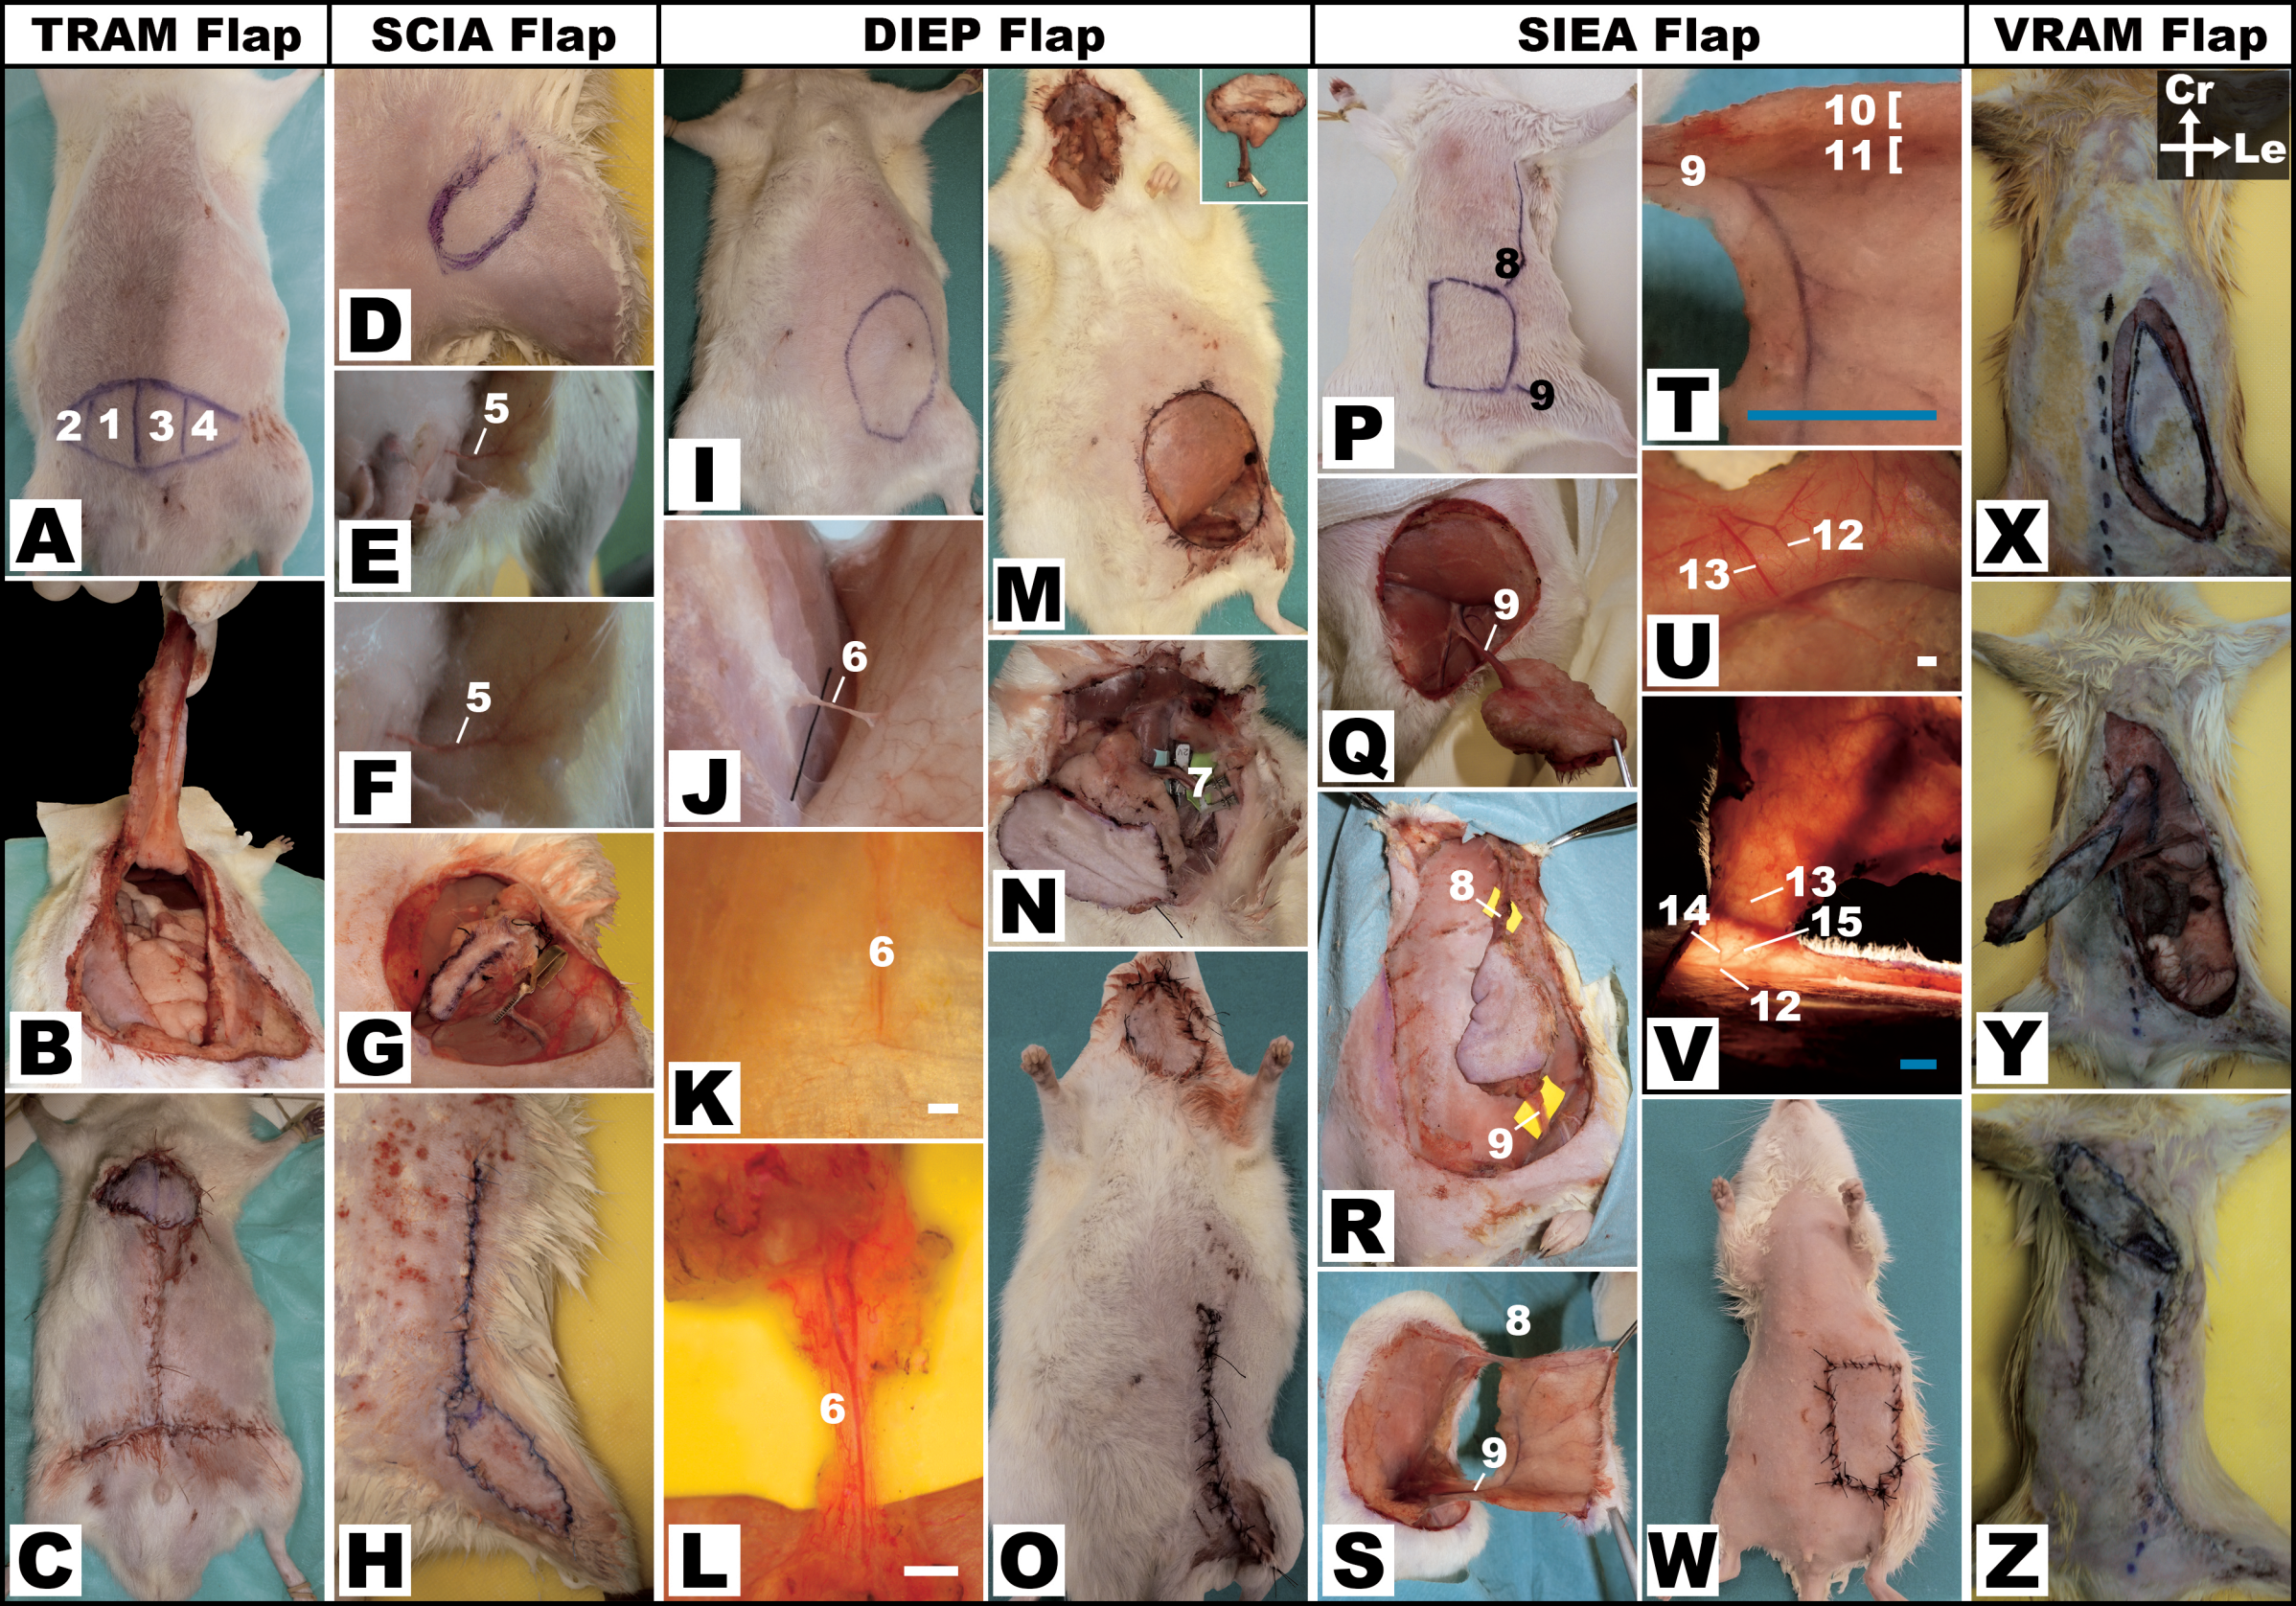

Supplement: gox-5-e1454-s009.pdf [file gox-5-e1454-s009.pdf]
